# Supplementary material for: Pseudorotaxane formation affected by stereo-electronic effects. A theoretical and experimental study
Source: Royal Society of Chemistry journal article supplement (doi:10.1039/d1cp04300e), 2021-12-10
Supplement: d1cp04300e1.pdf [file d1cp04300e1.pdf]

## Electronic Supporting Information. Pseudorotaxane Formation Affected by Stereo-Electronic Effects. A Theoretical and Experimental Study

Rodolfo D. Porasso,<sup>a</sup> Matias I Sancho,<sup>b</sup> Mercedes Parajó,<sup>c</sup> Luis García-Río<sup>\*c</sup> and Ricardo D. Enriz<sup>\*b</sup>

### 1 <sup>1</sup>H NMR spectra characterization of compounds I-VIII

- **Bolaform I.** 1H-RMN (300 MHz, D<sub>2</sub>O, ppm):  $\delta = 8.86$  (s, 4H), 8.57 (s, 2H), 8.08 (s, 4H), 4.62 (t, 4H), 2.02 (t, 4H), 1.34 (s, 4H) y 1.25 (s, 12H).
- **Bolaform II.** 1H-RMN (300 MHz, DMSO-d<sub>6</sub>, ppm):  $\delta = 8.93$  (d, 4H), 7.99 (d, 4H), 4.52 (t, 4H), 2.60 (t, 6H), 1.87 (t, 4H) y 1.23 (m, 16H).
- **Bolaform III.** 1H-RMN (300 MHz, DMSO-d<sub>6</sub>, ppm):  $\delta = 9.07$  (s, 2H), 8.97 (d, 2H), 8.45 (d, 2H), 8.06 (t, 2H), 4.56 (t, 4H), 1.91 (t, 4H) y 1.25 (m, 16H).
- **Bolaform IV.** 1H-RMN (300 MHz, DMSO-d<sub>6</sub>, ppm):  $\delta = 8.99$  (d, 2H), 8.47 (t, 2H), 8.04 (d, 2H), 7.97 (t, 2H), 4.52 (t, 4H), 2.84 (s, 6H), 1.83 (t, 4H), 1.32 (s, 4H) y 1.26 (s, 12H).
- **Bolaform V.** 1H-RMN (300 MHz, D<sub>2</sub>O, ppm):  $\delta = 8.50$  (s, 2H), 8.16 (d, 2H), 7.73 (d, 2H), 4.46 (t, 4H), 2.75 (s, 6H), 2.45 (s, 6H), 1.90 (t, 4H) y 1.30 (m, 16H).
- **Bolaform VI.** 1H-RMN (300 MHz, D<sub>2</sub>O, ppm):  $\delta = 8.12$  (t, 2H), 7.64 (d, 4H), 4.44 (t, 4H), 2.83 (s, 12H), 1.85 (t, 4H) y 1.43 (m, 16H).
- **Bolaform VII.** 1H-RMN (300 MHz, D<sub>2</sub>O, ppm):  $\delta = 8.47$  (s, 4H), 8.18 (s, 2H), 4.48 (t, 4H), 2.49 (s, 12H), 1.96 (t, 4H) y 1.26 (d, 16H).
- **Bolaform VIII.** 1H-RMN (400 MHz, D<sub>2</sub>O, ppm):  $\delta = 3.30$  (t, 4H), 3.11 (s, 1H), 1.79 (s (width), 4H), 1.37 (s, 4H) y 1.30 (s, 12H).

<sup>a</sup> Instituto de Matemática Aplicada San Luis (IMASL), CONICET. Facultad de Ciencias Físico Matemáticas y Naturales, Universidad Nacional de San Luis, Av. Ejército de los Andes 950, 5700, Argentina.

<sup>b</sup> Facultad de Química, Bioquímica y Farmacia, Universidad Nacional de San Luis; Instituto Multidisciplinario de Investigaciones Biológicas (IMIBIO-SL). Chacabuco 915, 5700 San Luis, Argentina.

<sup>c</sup> Departamento de Química Física, Facultad de Química, Universidad de Santiago de Compostela, 15782 Santiago, Spain.

\* Corresponding authors: deriz@unsl.edu.ar and luis.garcia@usc.es

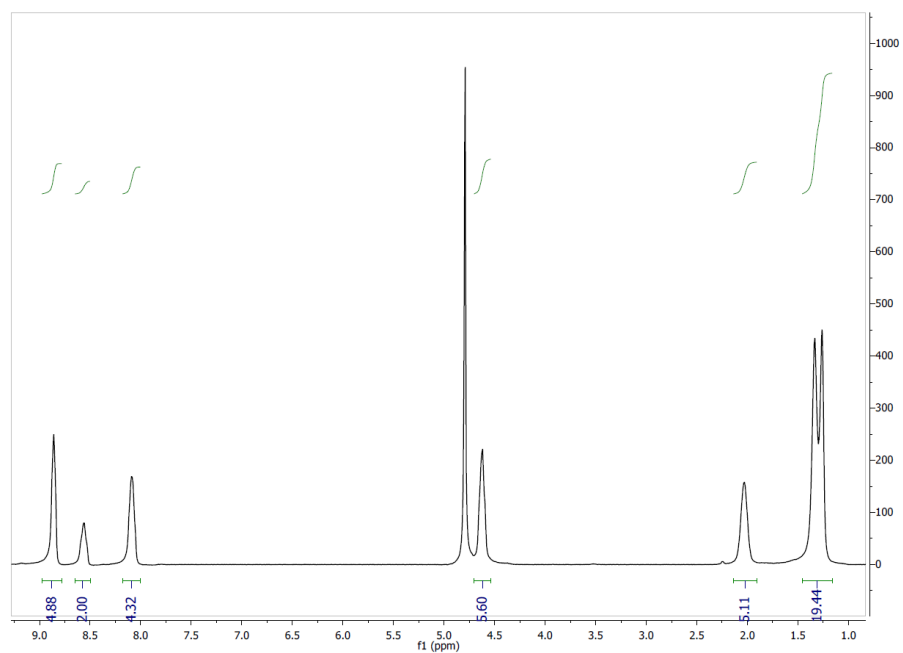

Fig. ESI 1 1H NMR spectrum of **bolaform I** in D<sub>2</sub>O.

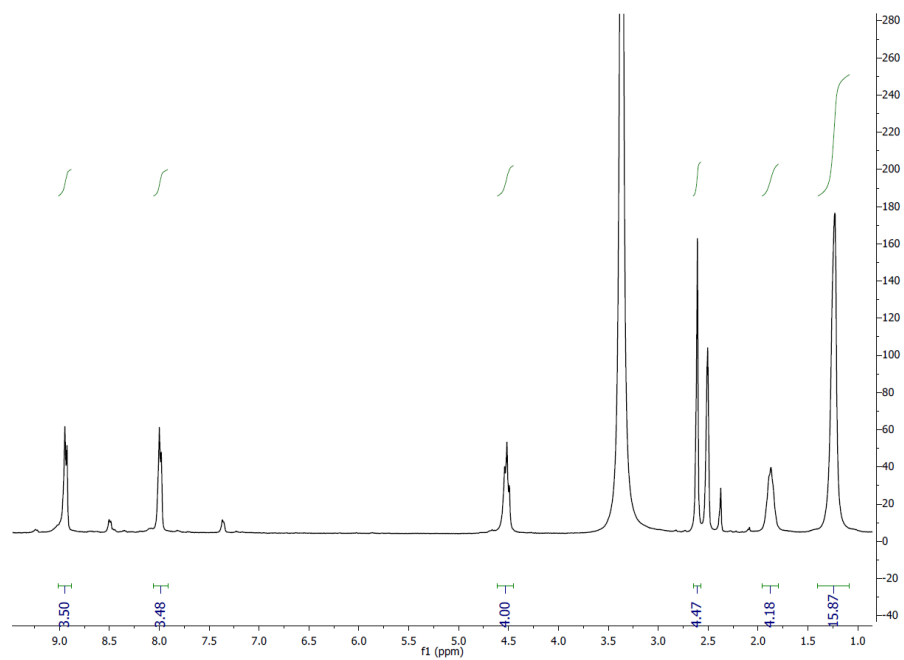

Fig. ESI 2 1H NMR spectrum of **bolaform II** in DMSO-d<sub>9</sub>.

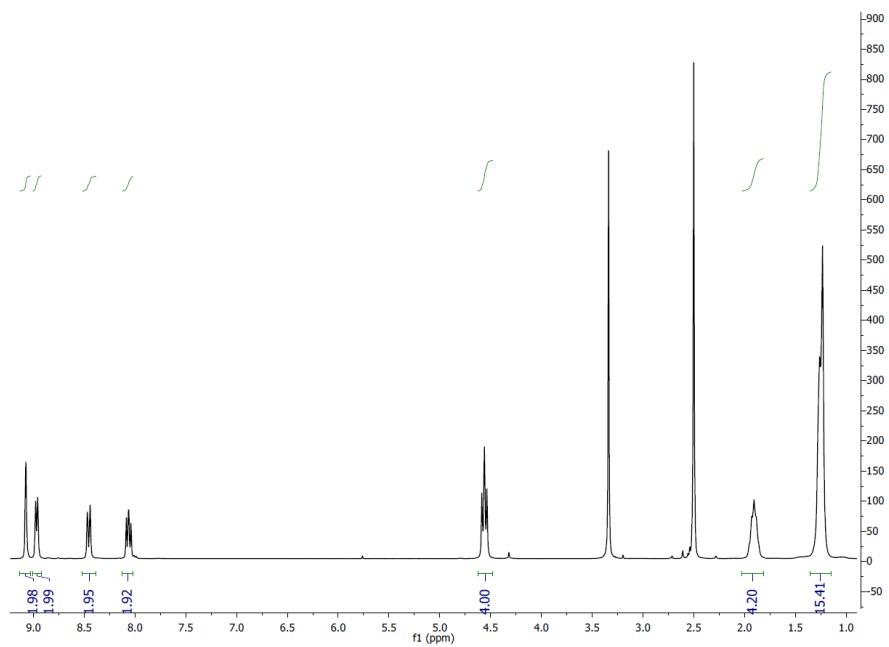

Fig. ESI 3  $^1\text{H}$  NMR spectrum of **bolaform III** in  $\text{DMSO-d}_9$ .

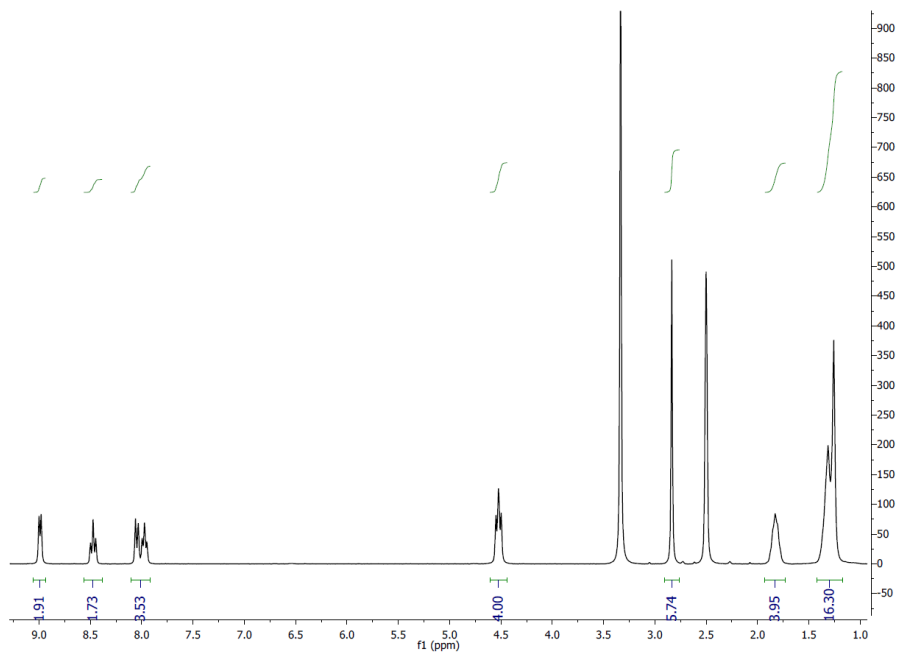

Fig. ESI 4  $^1\text{H}$  NMR spectrum of **bolaform IV** in  $\text{DMSO-d}_9$ .

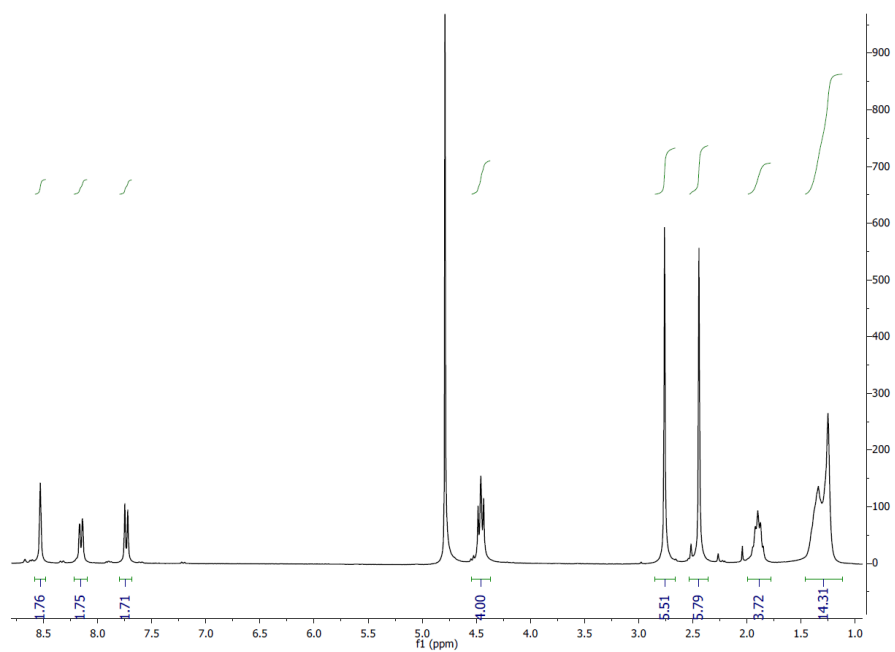

Fig. ESI 5 1H NMR spectrum of **bolaform V** in D<sub>2</sub>O.

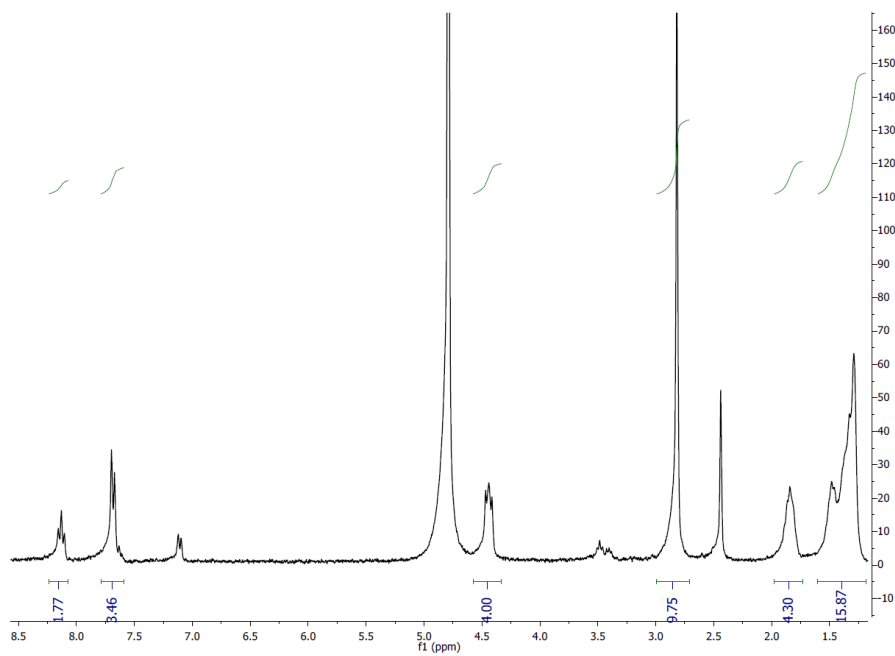

Fig. ESI 6 1H NMR spectrum of **bolaform VI** in D<sub>2</sub>O.

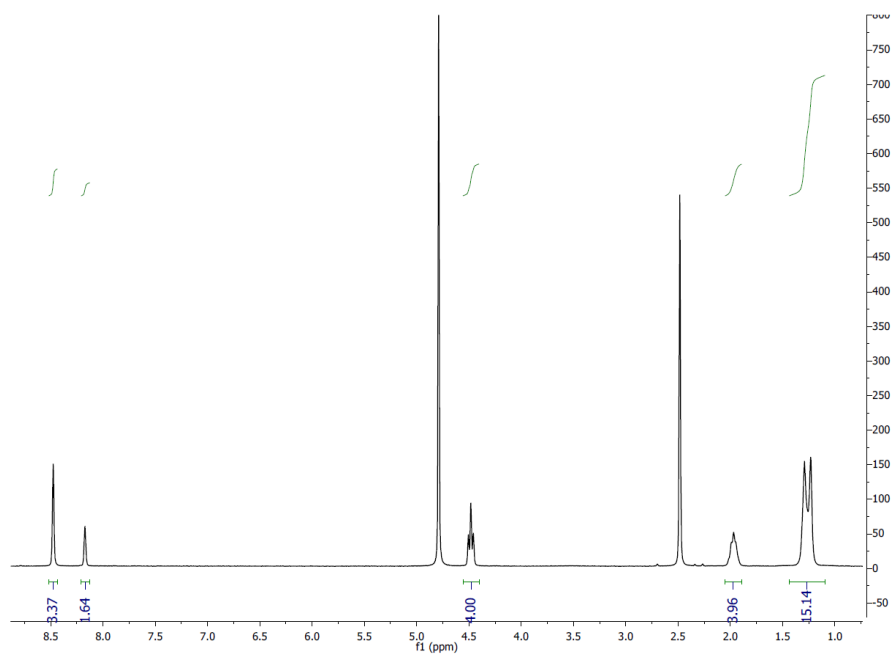

Fig. ESI 7 <sup>1</sup>H NMR spectrum of **bolaform VII** in D<sub>2</sub>O.

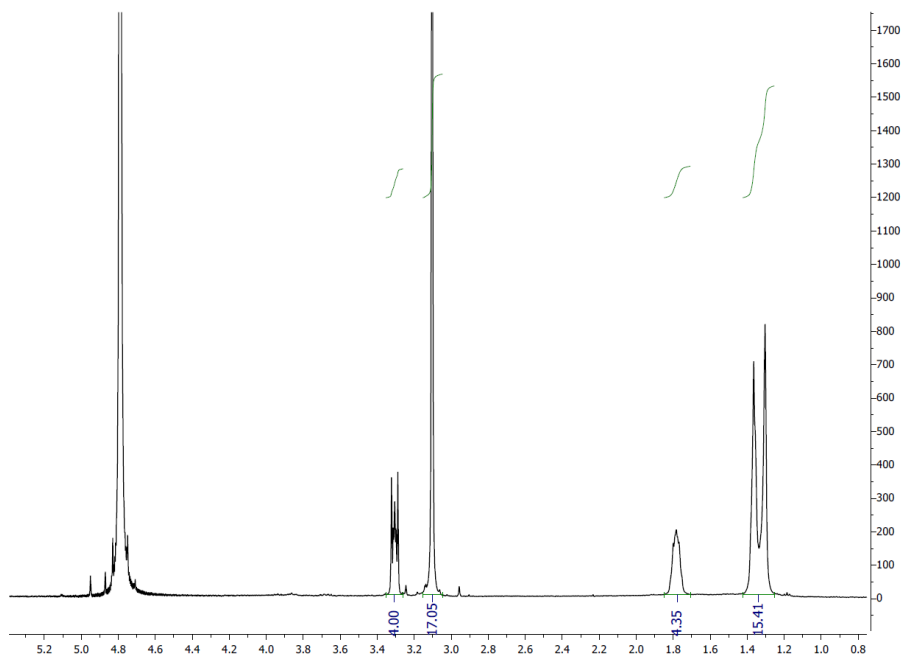

Fig. ESI 8 <sup>1</sup>H NMR spectrum of **bolaform VIII** in D<sub>2</sub>O.

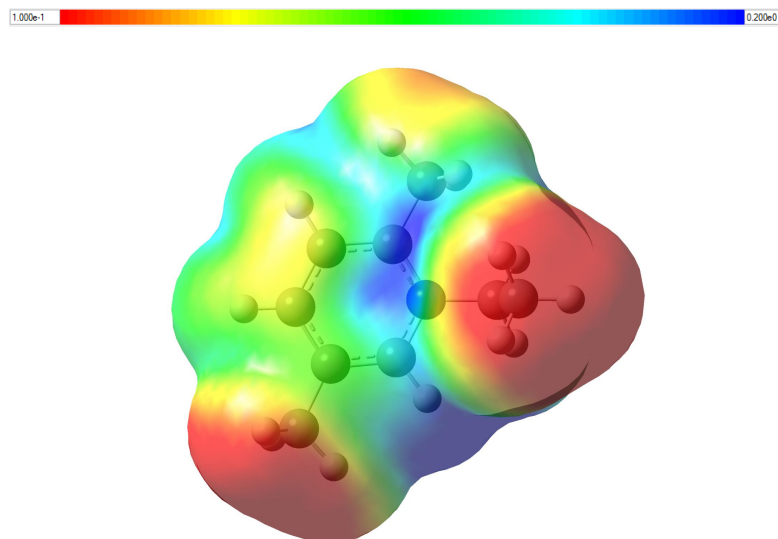

Fig. ESI 9 Electrostatic potential-encoded electron density surfaces obtained for the pyridinium rings of Axle V.

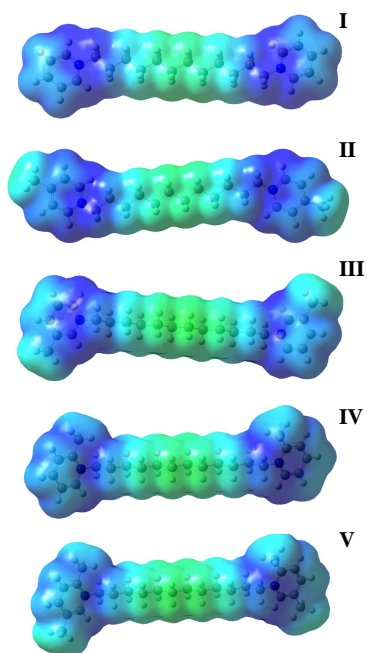

Fig. ESI 10 Electrostatic potential-encoded electron density surfaces obtained for Axles I-V.

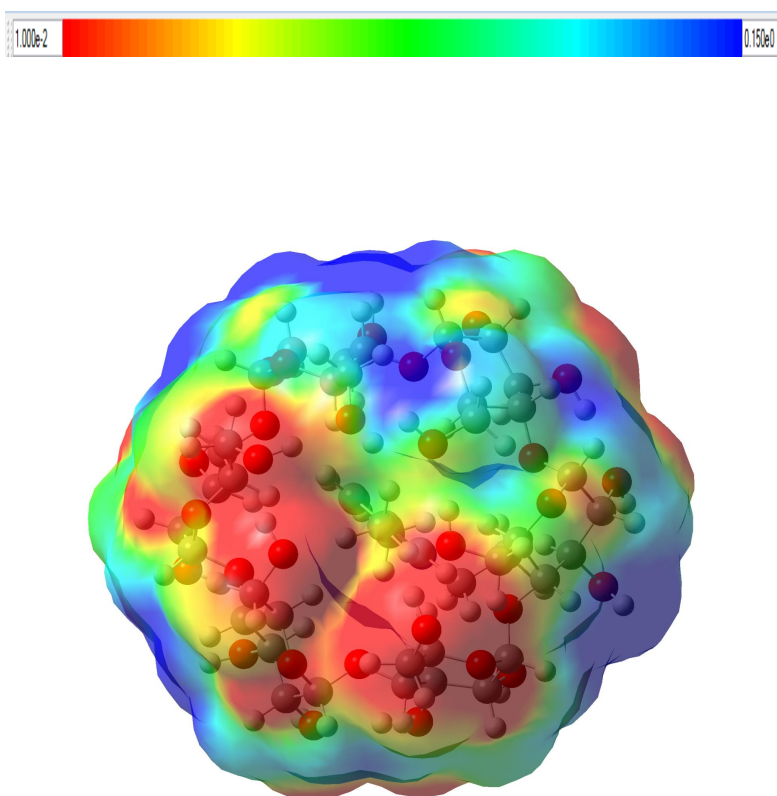

Fig. ESI 11 Map of electrostatic potential for the Axle  $\alpha$ -CD:V system.

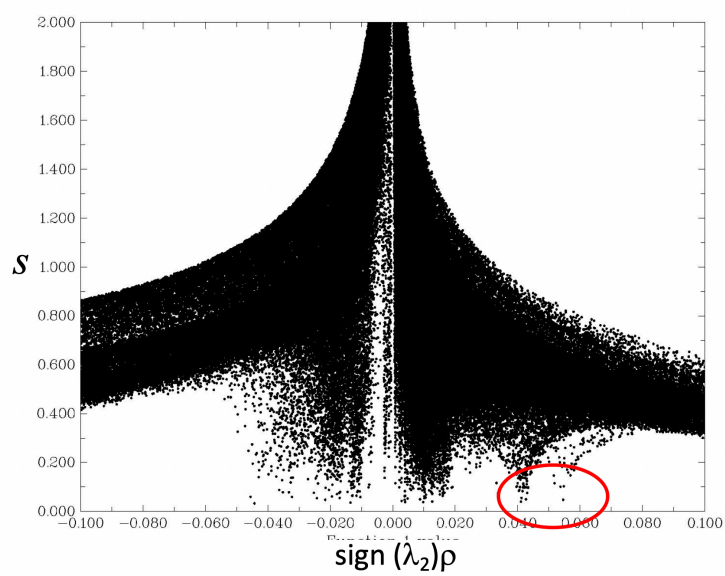

Fig. ESI 12 Scatter plot of  $S$  (RDG) vs  $\text{sign}(\lambda_2)\rho$  calculated for the Axle V: $\alpha$ -CD system.

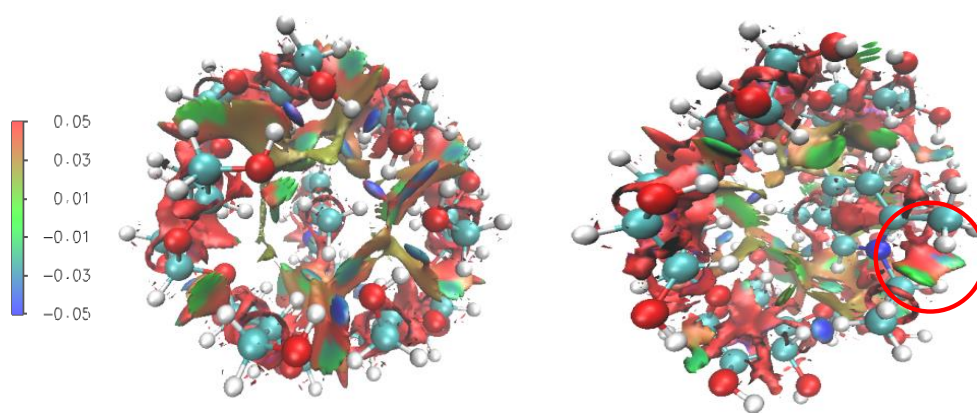

Fig. ESI 13 Front (left) and back (right) RDG base isosurfaces ( $s = 0.5a.u.$ ) of Axle V:α-CD complex colored on a scale according to sign  $(\lambda_2)\rho$  values.



### 3 Free energy calculations

In Figure 14 the window overlapping obtained from the Umbrella Sampling MD simulations is depicted for the  $\alpha$ -CD:Axle I system, when the Axle is inserted from the Head side of the cyclodextrine. As can be appreciated a good overlapping between the different windows simulations is obtained. Note that a denser overlap is obtained in the region  $-1.6 \text{ nm} < \xi < 0 \text{ nm}$  as is detailed in Section 2.4.2. For the other 16 Umbrella Sampling MD simulations, corresponding to the 8 systems when the bolaform is inserted for the both sides of the  $\alpha$ -CD, similar results are obtained and they are omitted for the sake of brevity.

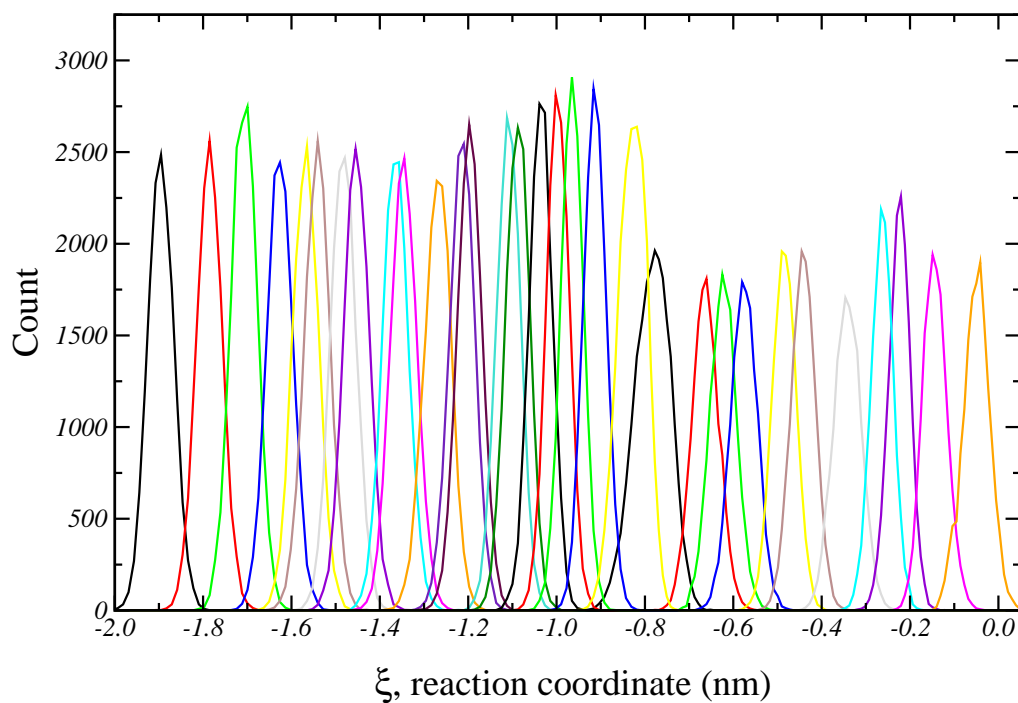

Fig. ESI 14 Windows overlapping for the  $\alpha$ -CD:Axle I system, obtained from Umbrella Sampling MD simulations.
